# Supplementary material for: Effectiveness and Safety of Dabrafenib in the Treatment of 20 Chinese Children with BRAFV600E-Mutated Langerhans Cell Histiocytosis
Source: PubMed Central journal article supplement — Cancer Res Treat. 2020 Sep 15;53(1):261–9. doi: 10.4143/crt.2020.769 (PMC7812025; doi:10.4143/crt.2020.769), 2020-09-15
Supplement: crt-2020-769_S1_Table.pdf [file crt-2020-769_S1_Table.pdf]

**S1 Table.** Treatment protocol for children with LCH

| <b>Treatment element/drug</b>                      | <b>Single or daily dose</b>                             | <b>Days of administration</b>                                |
|----------------------------------------------------|---------------------------------------------------------|--------------------------------------------------------------|
| <b>First-line therapy</b>                          |                                                         |                                                              |
| Initial induction treatment course 1 <sup>a)</sup> |                                                         |                                                              |
| Prednisone                                         | 40 mg/m <sup>2</sup> /day, orally, in two divided doses | Days 1-28 (4 weeks), afterwards weekly reduction for 2 weeks |
| Vindesine                                          | 1.5 mg/m <sup>2</sup> /dose (max. 2 mg), i.v. bolus     | Days 1, 8, 15, 22, 29, 36 (once a week) for 6 weeks          |
| Initial induction treatment course 2 <sup>b)</sup> |                                                         |                                                              |
| Prednisone                                         | 40 mg/m <sup>2</sup> /day, orally, in two divided doses | Days 1-3, weekly for 6 weeks                                 |
| Vindesine                                          | 1.5 mg/m <sup>2</sup> /dose (max. 2 mg), i.v. bolus     | Days 1, 8, 15, 22, 29, 36 (once a week) for 6 weeks          |
| Maintenance treatment <sup>c)</sup>                |                                                         |                                                              |
| Prednisone                                         | 40 mg/m <sup>2</sup> /day, orally, in two divided doses | Days 1-5 every 3 weeks                                       |
| Vindesine                                          | 1.5 mg/m <sup>2</sup> /dose (max. 2 mg), i.v. bolus     | Day 1 every 3 weeks                                          |
| 6-Mercaptopurine                                   | 50 mg/m <sup>2</sup> /day, orally                       | Daily, every night                                           |
| Methotrexate                                       | 50 mg/m <sup>2</sup> /dose                              | Day 7, weekly                                                |
| <b>Second-line therapy</b>                         |                                                         |                                                              |
| Intensification treatment                          |                                                         | Every 4 weeks, for 4 courses                                 |
| Cladribine                                         | 5 mg/m <sup>2</sup> /day, i.v.gtt                       | Days 2-6                                                     |
| Cytarabine                                         | 100 mg/m <sup>2</sup> /day, i.v.gtt                     | Days 1-5                                                     |
| Vindesine                                          | 1.5 mg/m <sup>2</sup> /dose (max. 2 mg), i.v. bolus     | Day 1                                                        |
| Dexamethasone                                      | 6 mg/m <sup>2</sup> /day, i.v./oral                     | Days 1-5                                                     |
| Maintenance treatment                              |                                                         |                                                              |
| Prednisone                                         | 40 mg/m <sup>2</sup> /day, orally, in two divided doses | Days 1-5, every 3 weeks                                      |
| Vindesine                                          | 1.5 mg/m <sup>2</sup> /dose (max. 2 mg), i.v. bolus     | Day 1 every 3 weeks                                          |
| 6-Mercaptopurine                                   | 50 mg/m <sup>2</sup> /day, orally                       | Daily, every night                                           |
| Methotrexate                                       | 20 mg/m <sup>2</sup> /dose                              | Weekly                                                       |

AD, active disease; i.v., intravenously; i.v.gtt, intravenously guttae; LCH, Langerhans cell histiocytosis; MS, multisystem; NAD, nonactive disease; SS, single system. <sup>a)</sup>After the first weeks of initial treatment (6 weeks), response to treatment was evaluated. Patients with disease state of NAD were directly admitted to maintenance therapy. Patients with AD-Better, AD-Stable or AD-Mixed were given the second induction treatment course. SS or MS RO<sup>-</sup> patients with AD-Worse were given second-line therapy. MS RO<sup>+</sup> patients who were in AD-Worse or those with no improvement in risk organs were given salvage therapy, <sup>b)</sup>Patients with disease state of NAD and MS patients with AD-Better response after the second course (12 weeks) were then given maintenance therapy. MS patients with AD-Mixed or AD-Worse were given second-line therapy. MS RO<sup>+</sup> patients with AD-Worse response in risk organs were given salvage therapy, <sup>c)</sup>The overall treatment duration was 12 months.
