# Supplementary material for: Effectiveness and Safety of Dabrafenib in the Treatment of 20 Chinese Children with BRAFV600E-Mutated Langerhans Cell Histiocytosis
Source: PubMed Central journal article supplement — Cancer Res Treat. 2020 Sep 15;53(1):261–9. doi: 10.4143/crt.2020.769 (PMC7812025; doi:10.4143/crt.2020.769), 2020-09-15
Supplement: crt-2020-769_S7_Fig.pdf [file crt-2020-769_S7_Fig.pdf]

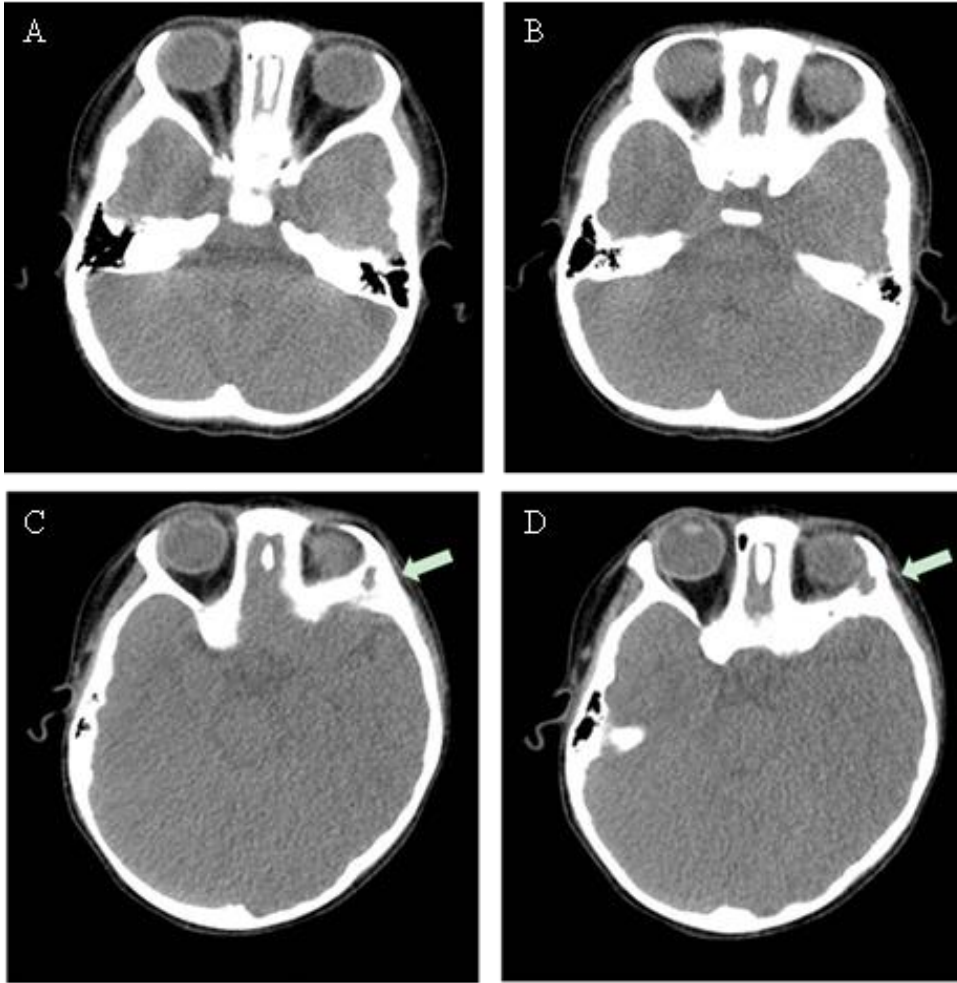

**S7 Fig.** New lesions (arrows) in bone during chemotherapy. (A, B) There was not lesion in left orbital bone before chemotherapy. (C, D) New bone lesion (left orbital bone) could be found during chemotherapy.
