# Supplementary material for: Effectiveness and Safety of Dabrafenib in the Treatment of 20 Chinese Children with BRAFV600E-Mutated Langerhans Cell Histiocytosis
Source: PubMed Central journal article supplement — Cancer Res Treat. 2020 Sep 15;53(1):261–9. doi: 10.4143/crt.2020.769 (PMC7812025; doi:10.4143/crt.2020.769), 2020-09-15
Supplement: crt-2020-769_S8_Fig.pdf [file crt-2020-769_S8_Fig.pdf]

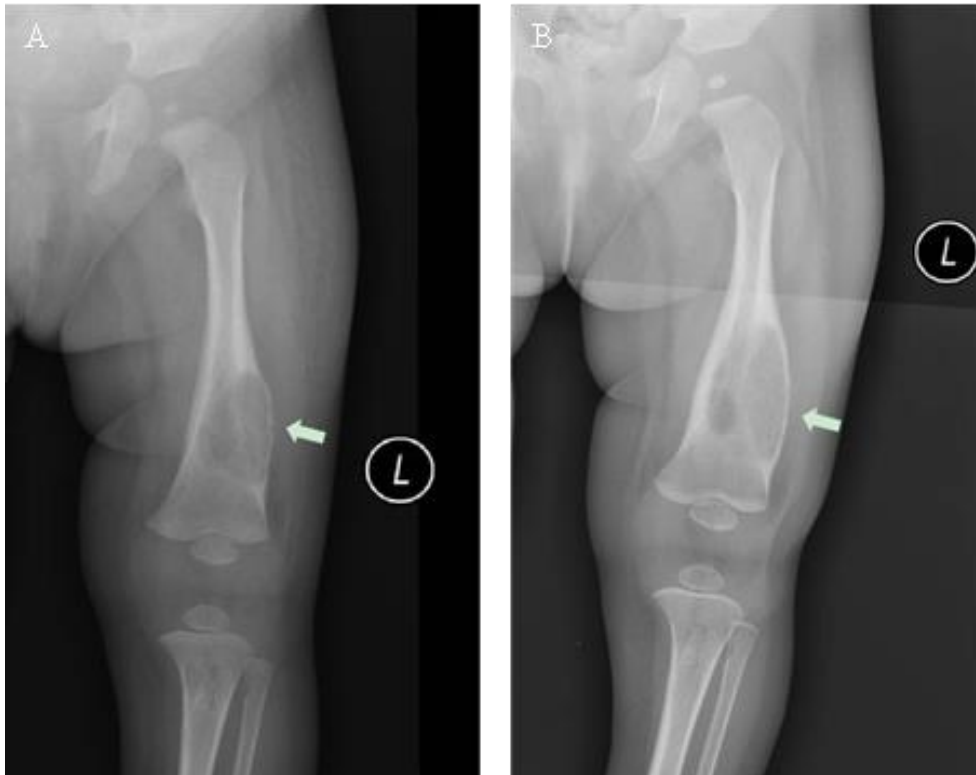

**S8 Fig.** Dilated bone lesion (arrows) during chemotherapy. (A) X-ray plain film of bone lesion (left femur) before chemotherapy. (B) Dilated bone lesion could be found during chemotherapy.
