# Supplementary figures and images for: Effectiveness and Safety of Dabrafenib in the Treatment of 20 Chinese Children with BRAFV600E-Mutated Langerhans Cell Histiocytosis
Source: PubMed Central journal article supplement — Cancer Res Treat. 2020 Sep 15;53(1):261–9. doi: 10.4143/crt.2020.769 (PMC7812025; doi:10.4143/crt.2020.769), 2020-09-15

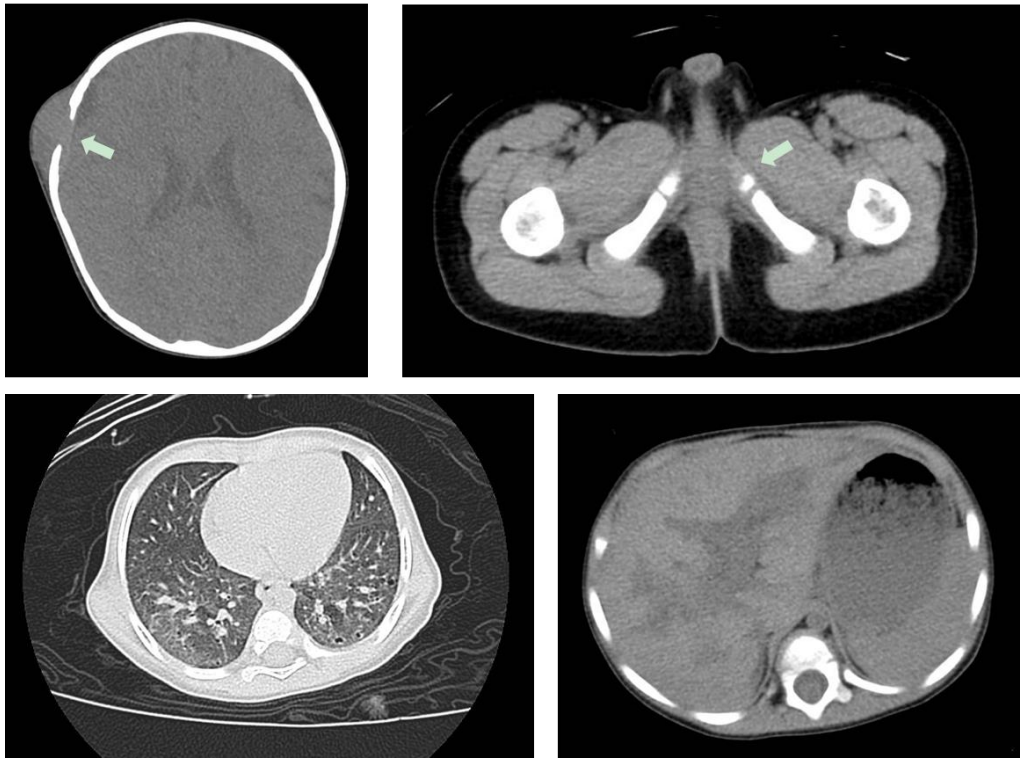

**S2 Fig.** Lesions (arrows) in bones (A, B), lung (C), and liver (D).

Supplement: crt-2020-769_S2_Fig.pdf [file crt-2020-769_S2_Fig.pdf]

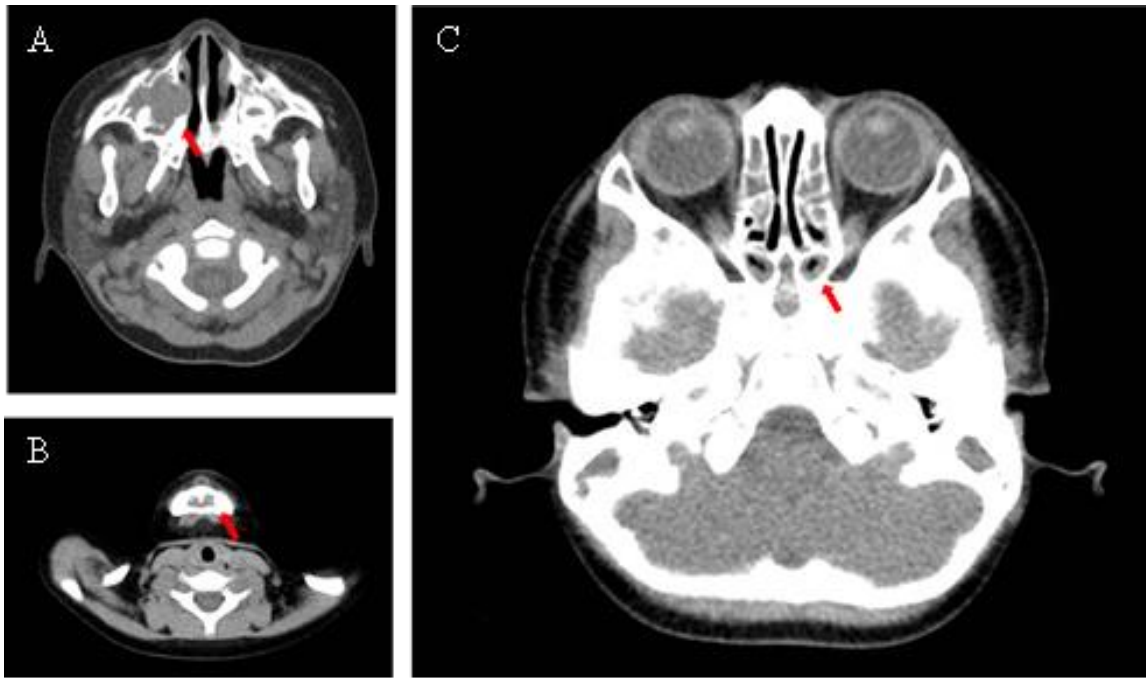

**S3 Fig.** Two bone (A, B) and soft tissue (C) lesions (arrows).

Supplement: crt-2020-769_S3_Fig.pdf [file crt-2020-769_S3_Fig.pdf]

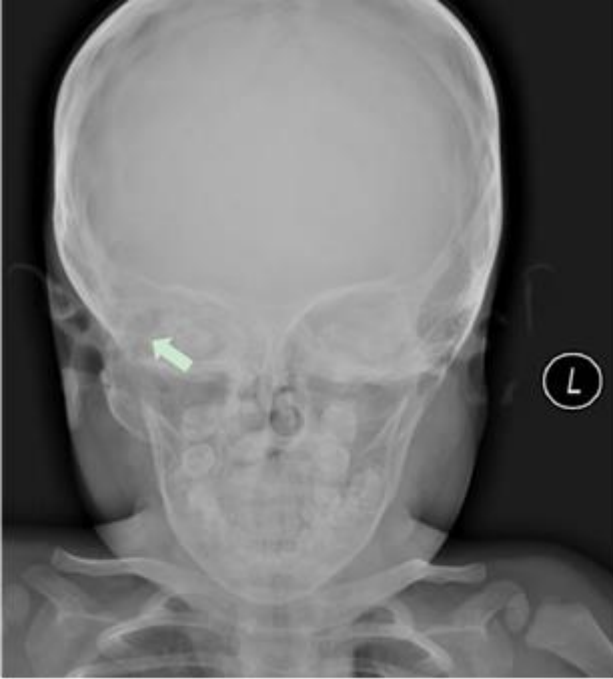

**S5 Fig.** Bone lesion (arrow) in right orbital bone.

Supplement: crt-2020-769_S5_Fig.pdf [file crt-2020-769_S5_Fig.pdf]
